# Supplementary material
Source: publisher figshare collection journal article supplement (https://gsapubs.figshare.com/ndownloader/files/22411665)
Supplement: Supplementary file 1 [file 22411665]

## Sheet: Sheet1
Supplemental Table S5. U-Pb geochronologic analyses of Menchaca Formation (sample MEN04-3), Coahuila, Mexico (27° 07.334'N, 101° 54.350'W)*.
MEN04-3
		age, Ma
6/8 age	2s +/- abs	207*/206*	2s +/- abs
				Age	2 sigma
268.165	7.93798	387.37	19.6873	268.165	7.93798
308.119	9.14638	574.963	146.6	308.119	9.14638
311.351	9.22903	418.374	32.6372	311.351	9.22903
341.596	10.155	346.814	150.539	341.596	10.155
344.167	10.2687	241.697	167.698	344.167	10.2687
349.703	10.3802	296.878	25.7832	349.703	10.3802
365.578	10.8636	560.348	166.862	365.578	10.8636
366.2	10.9335	390.931	195.195	366.2	10.9335
366.469	10.8788	298.342	22.8511	366.469	10.8788
370.67	11.0128	424.806	55.3606	370.67	11.0128
378.859	11.2649	647.308	41.2115	378.859	11.2649
381.36	11.3252	358.851	29.7577	381.36	11.3252
398.022	11.8268	303.339	110.97	398.022	11.8268
405.183	12.0752	177.577	98.4175	405.183	12.0752
406.794	12.0854	434.28	30.6199	406.794	12.0854
411.4	12.2901	344.296	197.394	411.4	12.2901
413.381	12.3238	259.527	164.581	413.381	12.3238
416.136	12.3767	365.574	78.3977	416.136	12.3767
417.294	12.4203	425.363	51.562	417.294	12.4203
420.049	12.4815	392.812	49.4232	420.049	12.4815
424.084	12.6358	485.534	360.355	424.084	12.6358
425.277	12.6621	855.719	116.52	425.277	12.6621
433.961	12.9436	372.053	216.101	433.961	12.9436
442.487	13.1694	460.55	176.903	442.487	13.1694
448.692	13.3421	442.828	64.6504	448.692	13.3421
449.441	13.512	-125.518	438.465	449.441	13.512
450.648	13.409	363.107	51.9361	450.648	13.409
450.957	13.4134	286.679	67.9931	450.957	13.4134
459.374	13.6889	326.086	70.2429	459.374	13.6889
460.136	13.6867	199.64	63.7837	460.136	13.6867
461.143	13.7136	490.751	76.8783	461.143	13.7136
476.695	14.2454	224.262	205.145	476.695	14.2454
490.215	14.589	380.889	145.26	490.215	14.589
493.467	14.7058	389.387	235.118	493.467	14.7058
533.308	15.8568	495.494	80.4533	533.308	15.8568
534.495	15.897	437.004	75.3889	534.495	15.897
543.258	16.1607	382.422	66.6961	543.258	16.1607
544.259	16.1858	427.659	38.8701	544.259	16.1858
571.171	16.9709	393.323	19.2811	571.171	16.9709
589.078	17.5165	837.116	128.423	589.078	17.5165
618.696	18.3774	587.409	48.0883	618.696	18.3774
697.898	20.7354	383.035	71.6331	697.898	20.7354
701.68	20.8202	395.729	32.3165	701.68	20.8202
708.716	21.0194	646.272	32.9331	708.716	21.0194
775.114	22.9509	423.605	30.1546	775.114	22.9509
859.187	25.4195	626.807	64.4147	859.187	25.4195
937.565	27.6282	987.054	15.6588	937.565	27.6282
1064.02	31.2709	978.55	46.8631	978.55	46.8631
1074.15	31.5253	989.072	12.4786	989.072	12.4786
1497.59	47.2212	995.719	79.9545	995.719	79.9545
1484.69	45.7903	1005.45	12.7507	1005.45	12.7507
1448.25	43.0663	1008.1	17.5798	1008.1	17.5798
1468.2	44.5283	1027.16	17.2287	1027.16	17.2287
1512.4	48.2048	1034.12	22.1901	1034.12	22.1901
1392.94	39.3195	1034.75	15.7634	1034.75	15.7634
1476.08	45.11	1034.93	9.71822	1034.93	9.71822
1394.34	39.4395	1037.94	25.3994	1037.94	25.3994
1497.13	46.8972	1059.58	38.7834	1059.58	38.7834
1519.42	48.7623	1069.94	17.3447	1069.94	17.3447
1456.5	43.7164	1083.72	48.4524	1083.72	48.4524
1528.64	49.5331	1103.4	11.023	1103.4	11.023
1488.93	46.1375	1107.81	19.4171	1107.81	19.4171
1537.18	50.5373	1110.26	44.373	1110.26	44.373
1597.37	56.9109	1120.08	93.835	1120.08	93.835
1514.44	48.2614	1134.18	9.23395	1134.18	9.23395
1345.19	36.5954	1150.74	146.38	1150.74	146.38
1457.26	43.6814	1193	8.76422	1193	8.76422
1315.27	35.0685	1203.77	230.698	1203.77	230.698
1426.35	41.4922	1203.79	9.05953	1203.79	9.05953
1460.61	44.1909	1252.2	33.8327	1252.2	33.8327
1542.31	50.7724	1285.73	8.21925	1285.73	8.21925
1708.69	81.8507	1632.43	15.4022	1632.43	15.4022
1710.51	93.2922	1753.04	31.9453	1753.04	31.9453
1602.07	57.3782	1775.34	7.67499	1775.34	7.67499
1712.96	85.7868	1972.15	7.09839	1972.15	7.09839
1709.53	96.6618	1987	4.44127	1987	4.44127
					76
1657.22	65.8544	2759.07	9.08892
1012.99	29.7758	2466.16	7.11971
762.549	22.5813	2119.83	28.1135
* Analyzed at University of Texas at Austin; reported in Gray et al. (2008).
